# Supplementary material for: A pH-responsive stellate mesoporous silica based nanophotosensitizer for in vivo cancer diagnosis and targeted photodynamic therapy
Source: Royal Society of Chemistry journal article supplement (doi:10.1039/c8bm00386f), 2018-11-14
Supplement: c8bm00386f1.pdf [file c8bm00386f1.pdf]

## **Electronic Supporting Information**

### **A pH-responsive stellate mesoporous silica based nanophotosensitizer for in vivo cancer diagnosis and targeted photodynamic therapy**

Ai-Lan Lin, Song-Zi Li, Cai-Hong Xu, Xing-Shu Li, Bi-Yuan Zheng,  
Jun-Jie Gu, Mei-Rong Ke\*, Jian-Dong Huang\*

College of Chemistry, State Key Laboratory of Photocatalysis on Energy and  
Environment, Fujian Provincial Key Laboratory of Cancer Metastasis  
Chemoprevention and Chemotherapy, Fuzhou University, Fuzhou 350116, China.

*E-mail:* kemeirong@fzu.edu.cn (M.-R. Ke), jdhuang@fzu.edu.cn (J.-D. Huang)

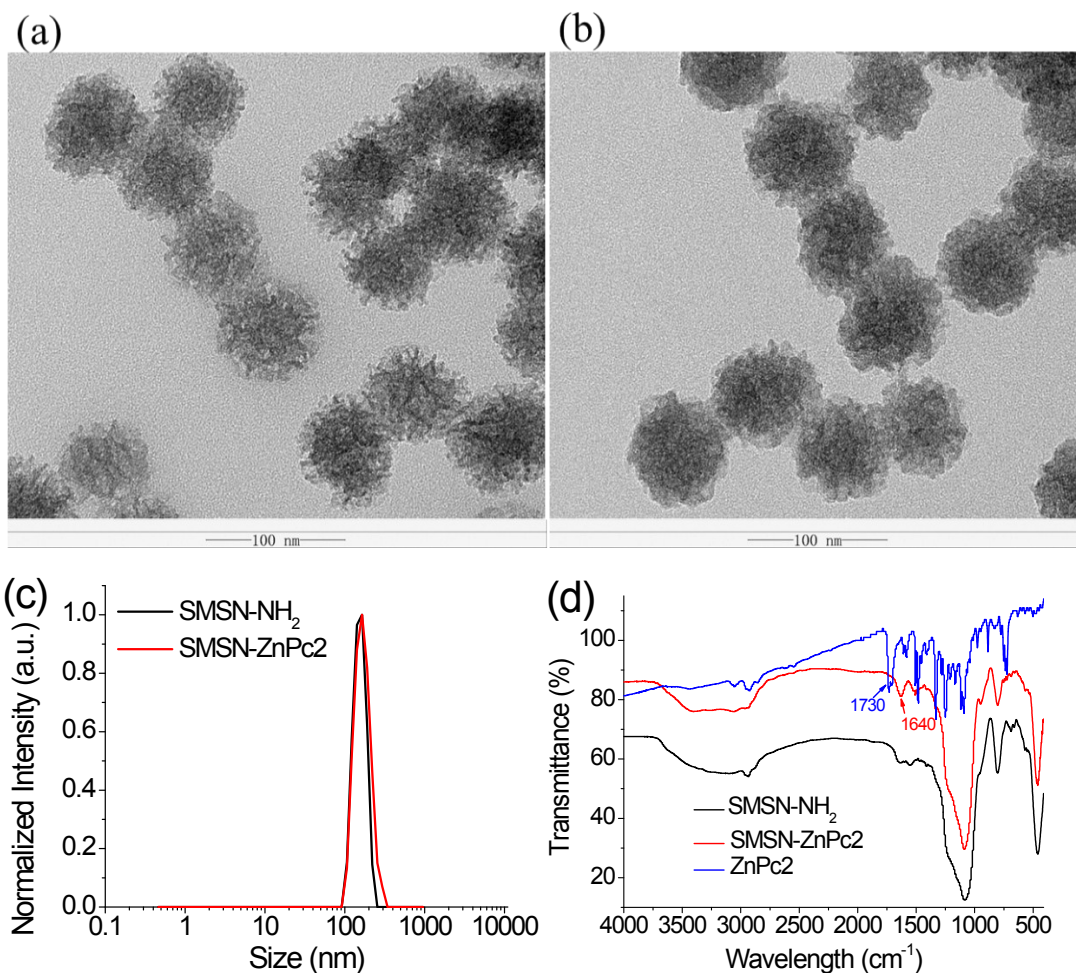

**Fig. S1** TEM images of (a) SMSN-NH<sub>2</sub> and (b) SMSN-ZnPc<sub>2</sub>. (c) Particle size distribution of SMSN-NH<sub>2</sub> and SMSN-ZnPc<sub>2</sub> measured by DLS. (d) FTIR spectra of SMSN-NH<sub>2</sub>, SMSN-ZnPc<sub>2</sub>, and ZnPc<sub>2</sub>.

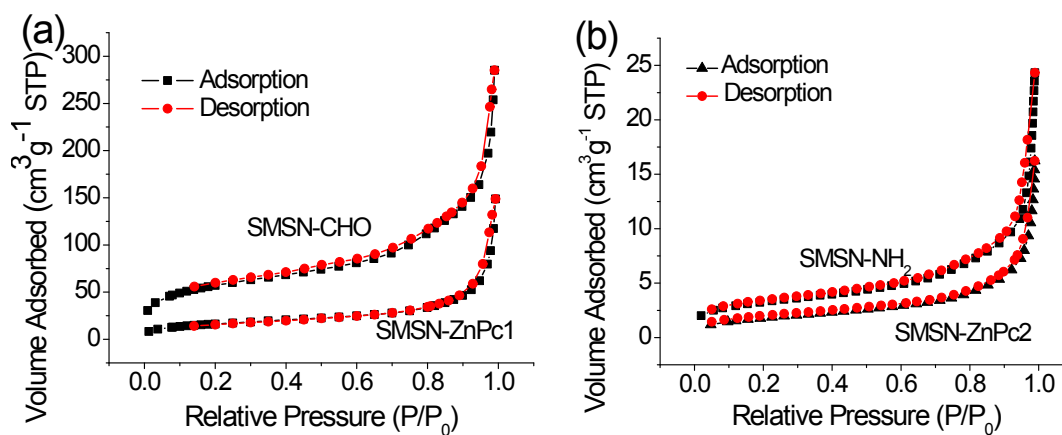

**Fig. S2** Nitrogen adsorption-desorption isotherms of (a) SMSN-CHO and SMSN-ZnPc<sub>1</sub>, and (b) SMSN-NH<sub>2</sub> and SMSN-ZnPc<sub>2</sub>.

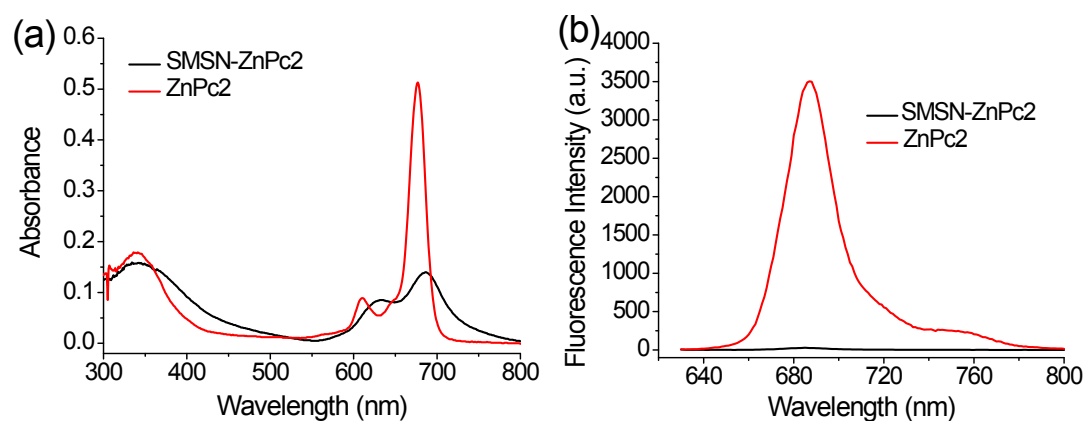

**Fig. S3** (a) UV-vis and (b) Fluorescence emission spectra of ZnPc2 and SMSN-ZnPc2 (both at 2  $\mu\text{M}$ ) in PBS (pH 7.4) containing 1% Cremophor EL.

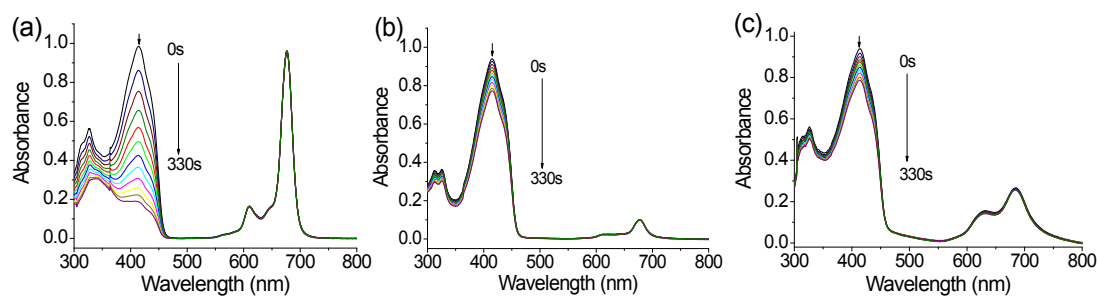

**Fig. S4** UV-vis spectra of (a) ZnPc1, (b) SMSN-ZnPc1, and (c) SMSN-ZnPc2 (all at 4  $\mu\text{M}$ ) in the presence of DPBF (50  $\mu\text{M}$ ) in PBS (pH 7.4) with 1% Cremophor EL at different irradiation time ( $\lambda \geq 610 \text{ nm}$ ,  $1.0 \text{ mW}\cdot\text{cm}^{-2}$ ).

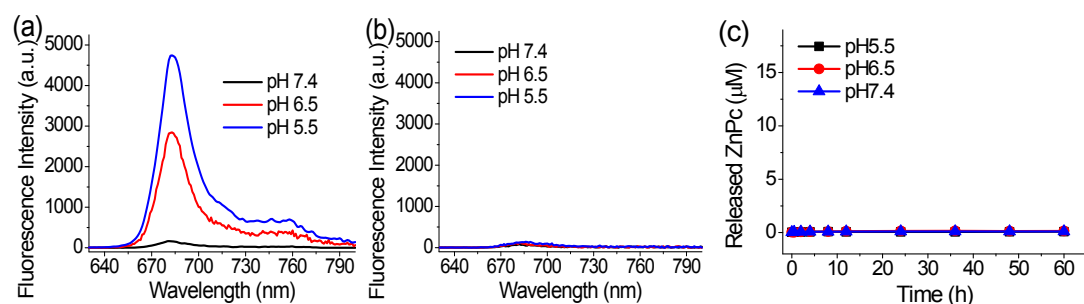

**Fig. S5** Fluorescence emission spectra of (a) SMSN-ZnPc1 and (b) SMSN-ZnPc2 after incubation in PBS at different pH values for 36 h (containing 1% Cremophor EL). (c) Accumulative released concentrations of SMSN-ZnPc2 in PBS (with 1% Cremophor EL) at different pH values.

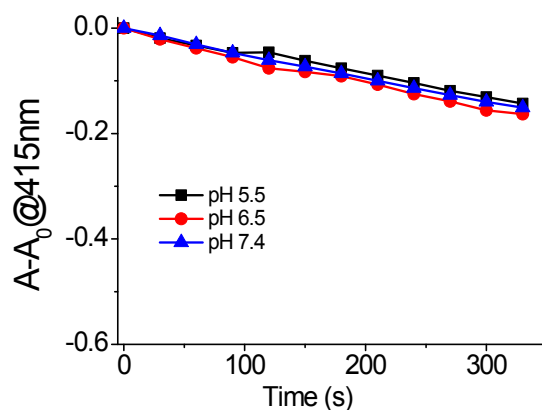

**Fig. S6** Comparison of photodegradation rate of DPBF induced by SMSN-ZnPc2 after being incubated in PBS at different pH values for 24 h with irradiation light ( $\lambda \geq 610$  nm,  $1.0 \text{ mW}\cdot\text{cm}^{-2}$ ).

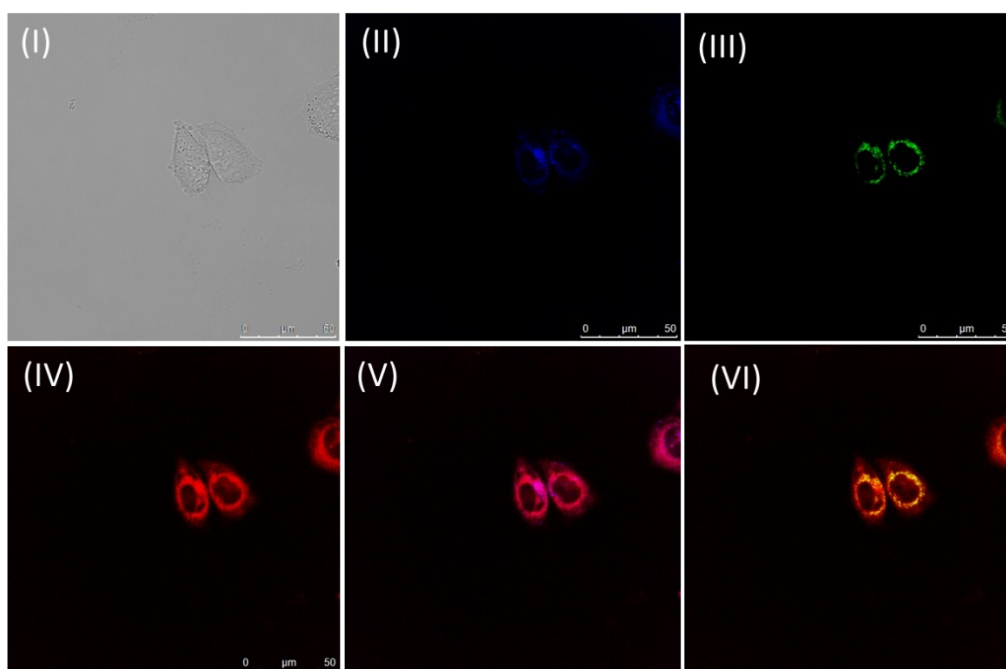

**Fig. S7** Subcellular localization of SMSN-ZnPc1 in HeLa cells. (I) Bright field, (II) Fluorescence of Lyso-Tracker ( $\lambda_{\text{ex}} = 543$  nm), (III) fluorescence of Mito-Tracker ( $\lambda_{\text{ex}} = 488$  nm), (IV) Fluorescence of SMSN-ZnPc1 ( $\lambda_{\text{ex}} = 635$  nm), (V) the corresponding superimposed images of SMSN-ZnPc1 with Lyso-Tracker, (VI) the corresponding superimposed images of SMSN-ZnPc1 with Mito-Tracker.

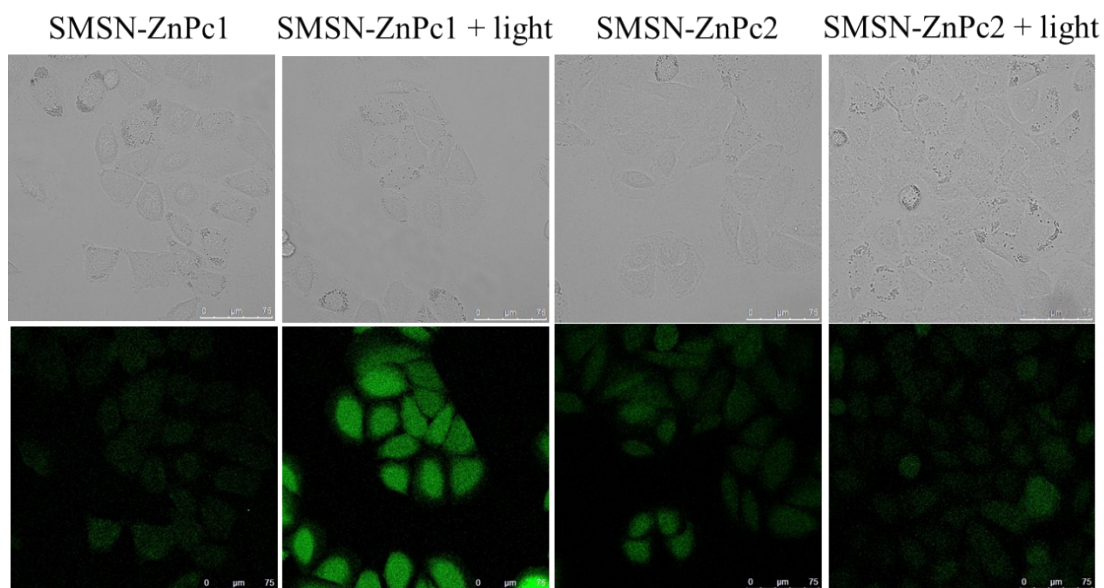

**Fig. S8** Bright-field (top row) and intracellular fluorescence (bottom row) images of DCFDA-stained HeLa cells incubated with SMSN-ZnPc1 and SMSN-ZnPc2 with or without irradiation ( $\lambda > 610$  nm,  $15 \text{ mW}\cdot\text{cm}^{-2}$  for 10 min).

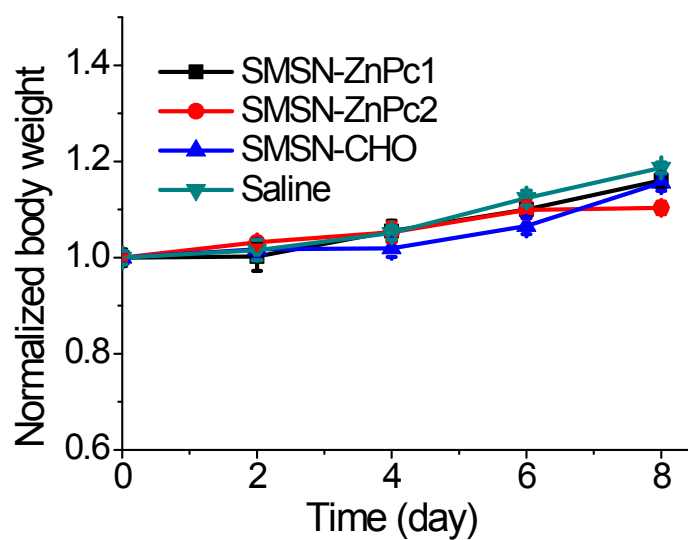

**Fig. S9** Normalized body weight changes of the tumor-bearing mice after PDT-treatment with SMSN-ZnPc1, SMSN-ZnPc2, SMSN-CHO, and saline, respectively. Illumination with laser light ( $\lambda_{\text{ex}} = 685$  nm,  $4.7 \text{ J}\cdot\text{cm}^{-2}$ ) was applied for PDT. Data are expressed as mean value  $\pm$  standard deviation ( $n = 5$ ).

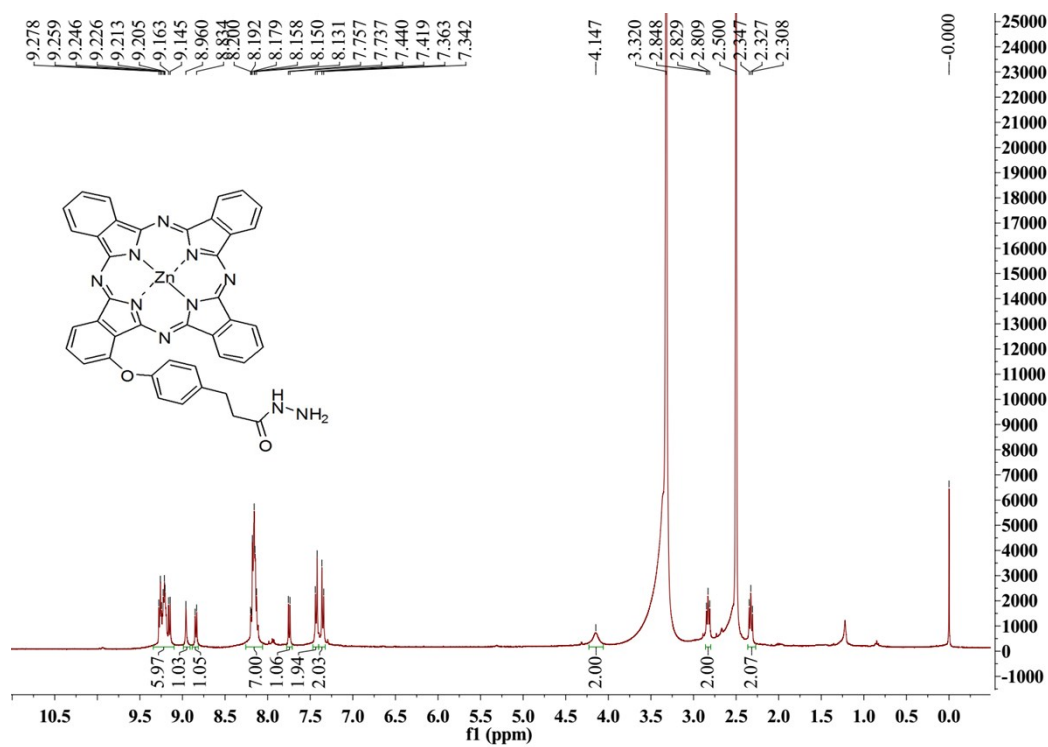

**Fig. S10**  $^1\text{H}$  NMR spectrum of ZnPc1 in DMSO- $d_6$ .

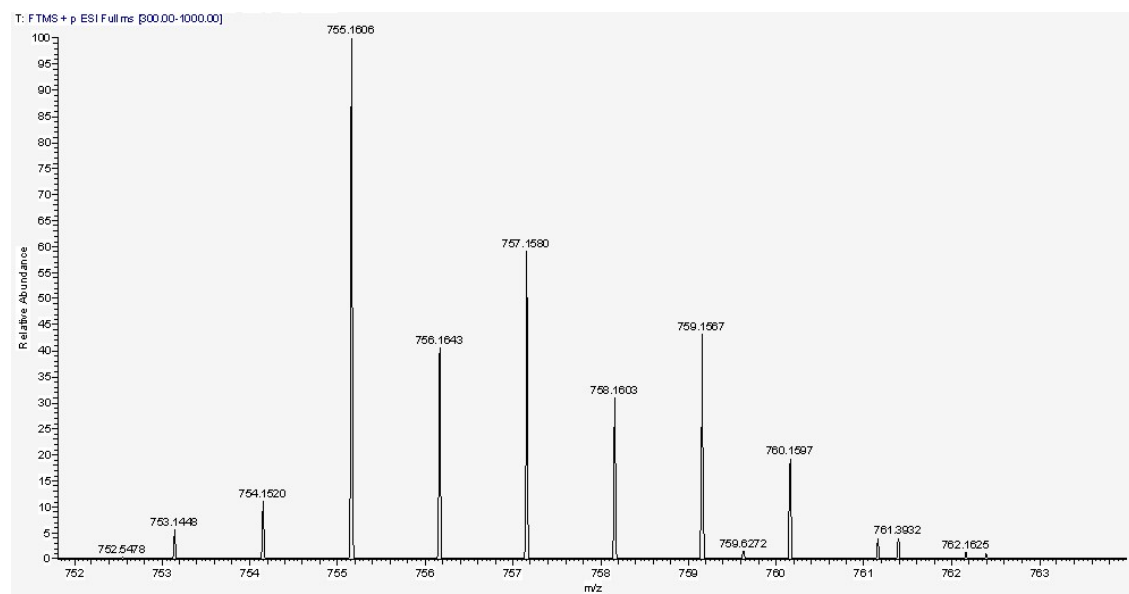

**Fig. S11** HRMS of ZnPc1
